# Supplementary material for: Lower extremity outcome measures: considerations for clinical trials in spinal cord injury
Source: PubMed Central journal article supplement (PMC6131138; doi:10.1038/s41393-018-0097-8), 2018-04-27
Supplement: 41393_2018_97_MOESM1_ESM.pdf [file 41393_2018_97_MOESM1_ESM.pdf]

Supplementary table I: Reliability and validity of continuous outcome measures

|                            | Scoring dimension             |             | Reliability                                                                                                                       |                                                | Validity                                                                                              |
|----------------------------|-------------------------------|-------------|-----------------------------------------------------------------------------------------------------------------------------------|------------------------------------------------|-------------------------------------------------------------------------------------------------------|
|                            |                               | Test-retest | Intra-rater                                                                                                                       | Inter-rater                                    |                                                                                                       |
| 10MWT                      | Gait speed (m/s)              |             | r=0.983 (n=22) [1]<br>ICC=0.98-0.99 (n=37) [2]                                                                                    | r=0.974 (n=20) [1]<br>ICC=0.95-0.98 (n=37) [2] | TUG: r=0.89 (n=70) [1]<br>6MWT: $\rho$ =-0.95 (n=62) [1]<br>WISCI II: $\rho$ =-0.68 (n=67) [1]        |
| 6mWT                       | Distance (m)                  |             | r=0.981 (n=22) [1]<br>ICC=0.99 (n=37) [2]                                                                                         | r=0.970 (n=20) [1]<br>ICC=0.99 (n=37) [2]      | 10MWT: $\rho$ =-0.95 (n=62) [1]<br>TUG: $\rho$ =-0.88 (n=62) [1]<br>WISCI II: $\rho$ =0.60 (n=60) [1] |
| 2mWT                       | Distance (m)                  |             | r=0.97 (n=46) [3] <sup>a</sup>                                                                                                    |                                                | 10mWT: r=0.932 (n=32) [4]<br>TUG: r=-0.623 (n=32) [4]<br>WISCI II: $\rho$ =0.749 (n=32) [4]           |
| TUG                        | Time (s)                      |             | r=0.979 (n=22) [1]                                                                                                                | r=0.973 (n=20) [1]                             | 10MWT: r=0.89 (n=70) [1]<br>6MWT: $\rho$ =-0.88 (n=62) [1]<br>WISCI II: $\rho$ =-0.76 (n=67) [1]      |
| SCAR                       | Arbitrary unit<br>linear unit |             |                                                                                                                                   |                                                | Internally validated with second independent data set.<br>Pearson separation index = 0.97 [5]         |
| 3D gait analysis           | Spatiotemporal                |             | Sagittal plane: ICC=0.83-0.99 (n=15) [6]<br>Frontal plane: ICC=0.90-0.97 (n=15) [6]<br>Transverse plane: ICC=0.50-0.98 (n=15) [6] |                                                | Considered to be the gold standard for determining lower limbs joint kinematics during walking [7]    |
| Instrumented walkways      | Spatiotemporal (s, m, m/s)    |             | ICC=0.83-0.97 (n=16) [8]                                                                                                          |                                                | CSA®-GAITRait®: 0.44-0.99 (n=25) [9] <sup>b</sup>                                                     |
| Inertial measurement units | Spatiotemporal                |             | ICC=0.55-0.94 (n=10) [10] <sup>b</sup>                                                                                            |                                                | 3D gait analysis: r=0.93-1.0 (n=1166 steps) [10] <sup>c</sup>                                         |

<sup>a</sup> no values for patients with SCI available. Values from subjects with neurological movement disorders.

<sup>b</sup> no values for patients with SCI available. Values from control subjects.

<sup>c</sup> no values for patients with SCI available. Values from mixed group (control (n=11) and PD (n=4) subjects).

$\rho$ : Spearman's rank correlation coefficient

r: Pearson correlation coefficient

ICC: intraclass correlation coefficient

10MWT ten meter walk test, 6mWT six minute walk test, 2mWT two minute walk test, TUG timed up and go test, SCAR spinal cord ability ruler
