# Supplementary material for: Lower extremity outcome measures: considerations for clinical trials in spinal cord injury
Source: PubMed Central journal article supplement (PMC6131138; doi:10.1038/s41393-018-0097-8), 2018-04-27
Supplement: 41393_2018_97_MOESM2_ESM.pdf [file 41393_2018_97_MOESM2_ESM.pdf]

Supplementary table II: Reliability and validity of ordinal outcome measures

| Scoring dimension                    |                       | Reliability |                                                                                                                                                        |                                                                                                                                                                                                                                                                                                                                                                         | Validity                                                                                                                                                                                                                                                                                                                                                                                               |
|--------------------------------------|-----------------------|-------------|--------------------------------------------------------------------------------------------------------------------------------------------------------|-------------------------------------------------------------------------------------------------------------------------------------------------------------------------------------------------------------------------------------------------------------------------------------------------------------------------------------------------------------------------|--------------------------------------------------------------------------------------------------------------------------------------------------------------------------------------------------------------------------------------------------------------------------------------------------------------------------------------------------------------------------------------------------------|
|                                      |                       | Test-retest | Intra-rater                                                                                                                                            | Inter-rater                                                                                                                                                                                                                                                                                                                                                             |                                                                                                                                                                                                                                                                                                                                                                                                        |
| ISNCSCI                              | Neurological measures |             | Upper extremity motor score: ICC=0.98 (n=2; 5 raters) [11]<br>Light touch: ICC=0.99 (n=4; 12 raters) [11]<br>Pin prick: ICC=0.99 (n=4; 12 raters) [11] | Total motor score: ICC=0.99 (n=43) [12]<br>Light touch: ICC=0.997 (n=30) [12]<br>Pin prick: ICC=0.988 (n=30) [12]<br>Total motor score: ICC=0.98 (n=16) [11]<br>Upper extremity motor score: ICC=0.96 (n=16) [11]<br>Lower extremity motor score: ICC=0.98 (n=6) [11]<br>Light touch: ICC=0.96 (n=16) [11]<br>Pin prick: ICC=0.89 (n=16) [11]<br>ICC=0.967 (n=372) [14] | 6MWT:<br>Total motor score: r=0.64 (n=152) [13]<br>LEMS: r=0.70 (n=152) [13]<br>UEMS: r=0.24 (n=152) [13]<br>10mWT:<br>Total motor score: r=0.63 (n=152) [13]<br>LEMS: r=0.69 (n=152) [13]<br>UEMS: r=0.24 (n=152) [13]<br>BBS:<br>Total motor score: r=0.75 (n=152) [13]<br>LEMS: r=0.79 (n=152) [13]<br>UEMS: r=0.30 (n=152) [13]<br>Rasch infit=0.94 (n=425) [15]<br>Rasch outfit=0.89 (n=425) [15] |
| SCIM III (mobility indoors/outdoors) | ambulatory capacity   |             |                                                                                                                                                        |                                                                                                                                                                                                                                                                                                                                                                         |                                                                                                                                                                                                                                                                                                                                                                                                        |
| FIM (locomotor items)                | ambulatory capacity   |             |                                                                                                                                                        | Mobility: r=0.733 (n=40) [16]<br>Locomotion: r=0.454 (n=40) [16]<br>Walk/wheelchair item: r=0.62 (n=57) [17]<br>Stairs item: r=0.32 (n=57) [17]                                                                                                                                                                                                                         | Walk/wheelchair<br>Rasch infit=1.29 (n=358) [18]<br>Rasch outfit=1.53 (n=358) [18]<br>Stairs<br>Rasch infit=3.56 (n=358) [18]<br>Rasch outfit=4.70 (n=358) [18]                                                                                                                                                                                                                                        |

| Scoring dimension               |                                                                   | Reliability                                                                                  |                                              |                                                                                               | Validity                                                                                                                              |
|---------------------------------|-------------------------------------------------------------------|----------------------------------------------------------------------------------------------|----------------------------------------------|-----------------------------------------------------------------------------------------------|---------------------------------------------------------------------------------------------------------------------------------------|
|                                 |                                                                   | Test-retest                                                                                  | Intra-rater                                  | Inter-rater                                                                                   |                                                                                                                                       |
| WISCI II                        | dependence/<br>independence for<br>walking                        | Self-selected WISCI:<br>ICC=0.994 (n=63) [19]                                                | Self-selected WISCI:<br>ICC=1.00 (n=26) [20] | Self-selected WISCI:<br>ICC=1.00 (n=26) [20]                                                  | Self-selected WISCI<br>MMT: $\rho=0.647$ (n=75) [19]                                                                                  |
|                                 |                                                                   | maximum WISCI:<br>ICC=0.995 (n=63) [19]                                                      | maximum WISCI:<br>ICC=1.00. (n=26) [20]      | maximum WISCI:<br>ICC=0.98 (n=26) [20]                                                        | Speed: $\rho=0.584$ (n=75) [19]                                                                                                       |
|                                 |                                                                   |                                                                                              |                                              |                                                                                               | maximum WISCI<br>MMT: $\rho=0.663$ (n=75) [19]<br>Speed: $\rho=0.693$ (n=75) [19]                                                     |
| SCI-FAI                         | quality of walking<br>assistive devices<br>ambulatory<br>capacity |                                                                                              | ICC=0.850-0.956 (n=22)<br>[21]               | ICC=0.703–0.840 (n=22)<br>[21]                                                                | Gait speed: $r=-0.70$ - $-0.74$ (n=22)<br>[21]<br>Self-report walking mobility:<br>$r=0.697$ (n=22) [21]                              |
| SCI-FAP                         | ambulatory<br>capacity                                            | Total score ICC = 0.983<br>(n=32) [22]<br>Individual items<br>ICC=0.952-0.998 (n=32)<br>[22] |                                              | Total score: ICC= 1.000<br>(n=32) [22]<br>Individual items:<br>ICC=0.994-1.000 (n=32)<br>[22] | Total score (n=32) [22]<br>10mWT: $r=-0.59$<br>6mWT: $r=-0.59$<br>Self-selected WISCI II: $r=-0.68$<br>max WISCI II: $r=-0.70$        |
| Berg Balance Scale              | balance<br>trunk control                                          |                                                                                              |                                              | ICC = 0.953 (n=40) [23]                                                                       | 2mWT: $\rho=0.781$ (n=32) [4]<br>10mWT: $\rho=0.792$ (n=32) [4]<br>TUG: $\rho=-0.815$ (n=32) [4]<br>WISCI II: $\rho=0.816$ (n=32) [4] |
| Neuromuscular recovery<br>scale | pre injury<br>movement pattern                                    | Total score:<br>$\rho=0.99$ (n=69) [24]<br>Individual items:<br>$\rho=0.84-0.99$ (n=69) [24] |                                              | Total score: ICC=0.97<br>(n=10) [25]<br>Individual items:<br>ICC=0.82-0.98 (n=10) [25]        | Individual items:<br>Rasch infit=0.47-1.50 (n=188) [26]<br>Rasch outfit=0.47-1.40 (n=188) [26]                                        |

$\rho$ : Spearman's rank correlation coefficient

r: Pearson correlation coefficient

ICC: intraclass correlation coefficient

*ISNCSCI* International standards for neurological classification of spinal cord injury, *SCIM III* spinal cord independence measure III, *FIM* functional independence measure, *WISCI II* walking index for spinal cord injury, *SCI-FAI* spinal cord injury functional ambulation inventory, *SCI-FAP* spinal cord injury functional ambulation profile
