# Supplementary material for: Lower extremity outcome measures: considerations for clinical trials in spinal cord injury
Source: PubMed Central journal article supplement (PMC6131138; doi:10.1038/s41393-018-0097-8), 2018-04-27
Supplement: 41393_2018_97_MOESM3_ESM.pdf [file 41393_2018_97_MOESM3_ESM.pdf]

Supplementary table III: Responsiveness and minimal detectable change (MDC) of continuous outcome measures

| Outcome measure            | Responsiveness                                                                                                                                                                                                                                                                                                                                                                                                                      | MDC                                                                                                                                                                                                 |
|----------------------------|-------------------------------------------------------------------------------------------------------------------------------------------------------------------------------------------------------------------------------------------------------------------------------------------------------------------------------------------------------------------------------------------------------------------------------------|-----------------------------------------------------------------------------------------------------------------------------------------------------------------------------------------------------|
| 10mWT                      | Mean change (m/s) between 1 and 3 months postinjury (P<0.001): Effect size: 0.90 <sup>a</sup> (n=18) [27]<br>Mean change (m/s) between 3 and 6 months postinjury (P<0.001): Effect size: 0.46 <sup>a</sup> (n=18) [27]<br><br>Assessed before and after at least 20 sessions of locomotor training<br>AIS A-D (n=152, median time post SCI: 0.9 years) SRM: 0.51 [13]<br>AIS C (n=39) SRM: 0.50 [13]<br>AIS D (n=49) SRM: 0.98 [13] | 0.13 m/s [15]                                                                                                                                                                                       |
| 6mWT                       | Mean change between 1 and 3 months postinjury (P<0.001): Effect size: 0.91 <sup>a</sup> (n=18) [27]<br>Mean change between 3 and 6 months postinjury (P<0.001): Effect size: 0.49 <sup>a</sup> (n=18) [27]<br><br>Assessed before and after at least 20 sessions of locomotor training<br>AIS A-D (n=152, median time post SCI: 0.9 years) SRM: 0.48 [13]<br>AIS C (n=39) SRM: 0.50 [13]<br>AIS D (n=49) SRM: 0.83 [13]             | 45.8 m [15]                                                                                                                                                                                         |
| 2mWT                       | NA                                                                                                                                                                                                                                                                                                                                                                                                                                  | NA                                                                                                                                                                                                  |
| TUG                        | NA                                                                                                                                                                                                                                                                                                                                                                                                                                  | 10.8s [15]                                                                                                                                                                                          |
| SCAR                       | NA                                                                                                                                                                                                                                                                                                                                                                                                                                  | NA                                                                                                                                                                                                  |
| 3D gait analysis           | NA                                                                                                                                                                                                                                                                                                                                                                                                                                  | NA                                                                                                                                                                                                  |
| Instrumented walkways      | NA                                                                                                                                                                                                                                                                                                                                                                                                                                  | Speed: 0.17 m/s (n=16) [8]<br>Step length: 0.11-0.17 m (n=16) [8]<br>Cadence: 13 steps/min (n=16) [8]<br>Single limb support: 0.22-0.28 s (n=16) [8]<br>Double limb support: 0.53-0.69 s (n=16) [8] |
| Inertial measurement units | NA                                                                                                                                                                                                                                                                                                                                                                                                                                  | NA                                                                                                                                                                                                  |

<sup>a</sup> Effect size = Hedge's g (unbiased) calculated from published data

MDC: minimal detectable change

NA: not available in SCI

SRM: standardized response mean

10MWT ten meter walk test, 6mWT six minute walk test, 2mWT two minute walk test, TUG timed up and go test, SCAR spinal cord ability ruler
