# Supplementary material for: Lower extremity outcome measures: considerations for clinical trials in spinal cord injury
Source: PubMed Central journal article supplement (PMC6131138; doi:10.1038/s41393-018-0097-8), 2018-04-27
Supplement: 41393_2018_97_MOESM4_ESM.pdf [file 41393_2018_97_MOESM4_ESM.pdf]

Supplementary table IV: Responsiveness and minimal detectable change (MDC) of ordinal outcome measures

| Outcome measure                      | Responsiveness                                                                                                                                                                                                                                                       | MDC                                                                              |
|--------------------------------------|----------------------------------------------------------------------------------------------------------------------------------------------------------------------------------------------------------------------------------------------------------------------|----------------------------------------------------------------------------------|
| LEMS (ISNCSCI)                       | Assessed before and after at least 20 sessions of locomotor training<br>AIS A-D (n=152, median time post SCI: 0.9 years) SRM: 0.23 [13]<br>AIS C (n=39) SRM: 0.72 [13]<br>AIS D (n=49) SRM: 0.16 [13]                                                                | AIS total motor score: 1.87 [28]                                                 |
| SCIM III (mobility indoors/outdoors) | Responsiveness compared with FIM (McNemar test): SCIM <sub>mob</sub> III identified more changes than FIM <sub>mob</sub> (P<0.01)[14,29]                                                                                                                             | SCIM <sub>mob</sub> III: 1.96 [30]                                               |
| FIM (locomotor items)                | Discrimination between paraplegia and tetraplegia (P<0.001): Effect size: 0.38 [15]<br>Score between admission and discharge from neurorehabilitation: FIM(walk/wheelchair): Effect size: 0.82 <sup>a</sup> [31]<br>FIM (stair): Effect size: 0.76 <sup>a</sup> [31] | FIM <sub>L</sub> : 4.4 [15]                                                      |
| WISCI II                             | Discrimination between 1 and 3 months postinjury (P<0.001) Effect size: 2.05 [15]<br>Discrimination between 3 and 6 months postinjury (P=0.004) Effect size: 0.73 [15]                                                                                               | Self-selected WISCI II: 0.785 (n=63) [19]<br>Maximum WISCI II: 0.597 (n=63) [19] |
| SCI-FAI (Gait score)                 | Mean change after an experimental gait intervention: 44.7% (P<0.001) (n=22) [21]                                                                                                                                                                                     | Gait score: 1.9 [15]                                                             |
| SCI-FAP                              | After two months of training (precision or endurance) SCI-FAP is responsive to change only in patients who walk at slow speeds (<0.5 m/s) [32]                                                                                                                       | SCI-FAP score: 95.7 [32]<br>SCI-FAP time (s): 114.2 [32]                         |
| Berg Balance Scale                   | Assessed before and after at least 20 sessions of locomotor training<br>AIS A-D (n=152, median time post SCI: 0.9 years) SRM: 0.59 [13]<br>AIS C (n=39) SRM: 0.65 [13]<br>AIS D (n=49) SRM: 0.91 [13]                                                                | NA                                                                               |
| NRS <sub>LE</sub>                    | Assessed before and after at least 20 sessions of locomotor training (n=72) NRS <sub>LE</sub> : ARM=1.07 [33]                                                                                                                                                        | NRS <sub>LE</sub> : 3 [33]                                                       |

<sup>a</sup> data from a heterogenic group of patients with Spinal Cord Injury, Multiple Sclerosis and Stroke

ARM: adjusted response mean

MDC: minimal detectable change

NA: not available in SCI

SRM: standardized response mean

LEMS lower extremity motor score, ISNCSCI International standards for neurological classification of spinal cord injury, SCIM III spinal cord independence measure III, FIM functional independence measure, WISCI II walking index for spinal cord injury, SCI-FAI spinal cord injury functional ambulation inventory, SCI-FAP spinal cord injury functional ambulation profile, NRS<sub>LE</sub> Neuromuscular recovery scale trunk and lower-extremity items
